# Supplementary material for: Celiac Disease and the Gluten Free Diet during the COVID-19 Pandemic: Experiences of Children and Parents
Source: MDPI journal article supplement (doi:10.3390/medicina59030425), 2023-02-21
Supplement: s1 [file s1]

Supplementary Materials

# Celiac Disease and the Gluten Free Diet during the COVID-19 Pandemic: Experiences of Children and Parents

**Supplementary Table S1.** Symptoms that occurred or worsened since start of the COVID-19 pandemic either related to celiac disease (CD) activity, a possible COVID-19 infection or both (concordant symptoms).

| Symptom                         | Associated with COVID-19 or CD       |
|---------------------------------|--------------------------------------|
| Common cold                     | COVID-19                             |
| Coughing                        | COVID-19                             |
| Stuffy feeling                  | COVID-19                             |
| Shortness of breath or wheezing | COVID-19                             |
| Sore throat                     | COVID-19                             |
| Fever                           | COVID-19                             |
| Sneezing                        | COVID-19                             |
| Coughing up mucus               | COVID-19                             |
| Fatigue                         | COVID-19 and CD (concordant symptom) |
| Muscle soreness                 | COVID-19                             |
| Chest pain                      | COVID-19                             |
| Diarrhea                        | COVID-19 and CD (concordant symptom) |
| Stomach ache                    | COVID-19 and CD (concordant symptom) |
| Nausea/ vomiting                | COVID-19 and CD (concordant symptom) |
| Eye infection                   | COVID-19                             |
| Lost sense of smell             | COVID-19                             |
| Headache                        | COVID-19 and CD (concordant symptom) |
| Constipation                    | CD                                   |
| Bloated stomach/ flatulence     | CD                                   |
| Weight loss                     | CD                                   |
| Lower energy level              | CD                                   |
| Red itchy rash                  | CD                                   |
| Sores in mouth                  | CD                                   |
